# Supplementary material for: Liquid phase electroepitaxy of semiconductors under static magnetic field
Source: Royal Society of Chemistry journal article supplement (doi:10.1039/c0ce00916d), 2011-01-01

**Appendix:**

Thermodynamic Data and Sources Used in Calculations:

| $^1S_{298}^0$ (J/deg mole) | $\Delta H_{\text{fusion}}$ (kJ/deg mole), | $T\Delta S_{\text{fusion}}$ (J/deg mole) |
|----------------------------|-------------------------------------------|------------------------------------------|
| <i>As(s)</i> 35.7          | $^1Ga$ 5.6, 303K                          | <i>Ga</i> 18.5                           |
| <i>Ga(s)</i> 41.0          | $^2As$ 27.7, 1090K                        | <i>As</i> 25.4                           |
| <i>GaAs (s)</i> 64.2       |                                           |                                          |

<sup>3</sup> Sublimation *As* 887K     $^2\Delta H_{\text{sub}As}$  31.9 kJ/mole     $\Delta S_{\text{sub}As}$  36.0 J/deg mole

<sup>1</sup>  $C_p(\text{J/deg mole}^*) = a + 10^{-3}bT + 10^5cT^{-2}$

|                |                                                    |
|----------------|----------------------------------------------------|
| <i>As(s)</i>   | $C_p = 23.2 + 5.5 \times 10^{-3}T$ (298 – 887K)    |
| $^2As(g)$      | $C_p = 20.8$ (887K)                                |
| <i>Ga(s)</i>   | $C_p = 26.1$ (298 – 303K)                          |
| <i>Ga(l)</i>   | $C_p = 26.4 + 1.3 \times 10^{-5}T^2$ (303 – 1200K) |
| <i>GaAs(s)</i> | $C_p = 45.2 + 6.1 \times 10^{-3}T$ (298 – 1238K)   |

\* Units given in (cal/deg mole) in Appendix.

- <sup>1</sup> O. Kubaschewski and C.B. Alcock, Metallurgical Thermochemistry, 5th Ed., Materials Science and Technology, Vol. 24, 1979, Pergamon Press, Toronto.
- <sup>2</sup> Qivx Inc. Integral Periodic Table: Properties of Arsenic ([www.qivx.com](http://www.qivx.com)).
- <sup>3</sup> As-Ga Phase Diagram: ASM Handbook, Vol. 3, Alloy Phase Diagrams, 1992, Materials Park, Ohio.

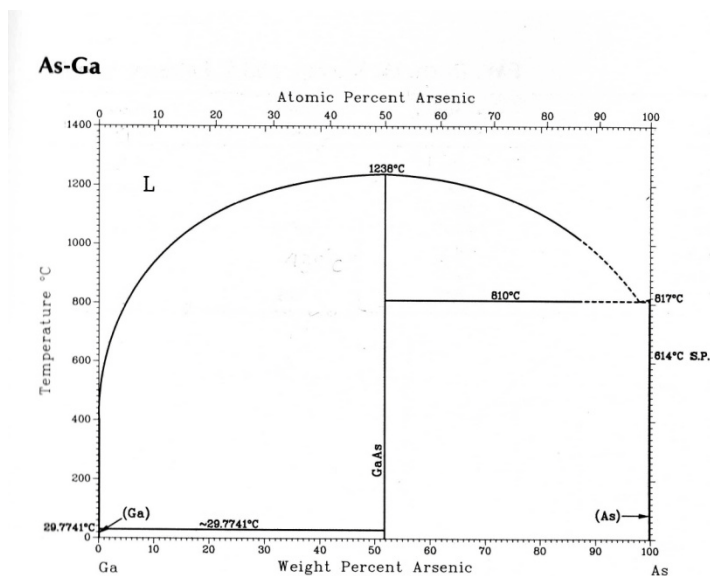

Supplement: c0ce00916d.pdf [file c0ce00916d.pdf]
